# Supplementary material
Source: Springer Nature journal article supplement (https://www.springermedizin.de/resource/supplementary/12991_2010_1275_MOESM1_ESM.pdf/9615630)

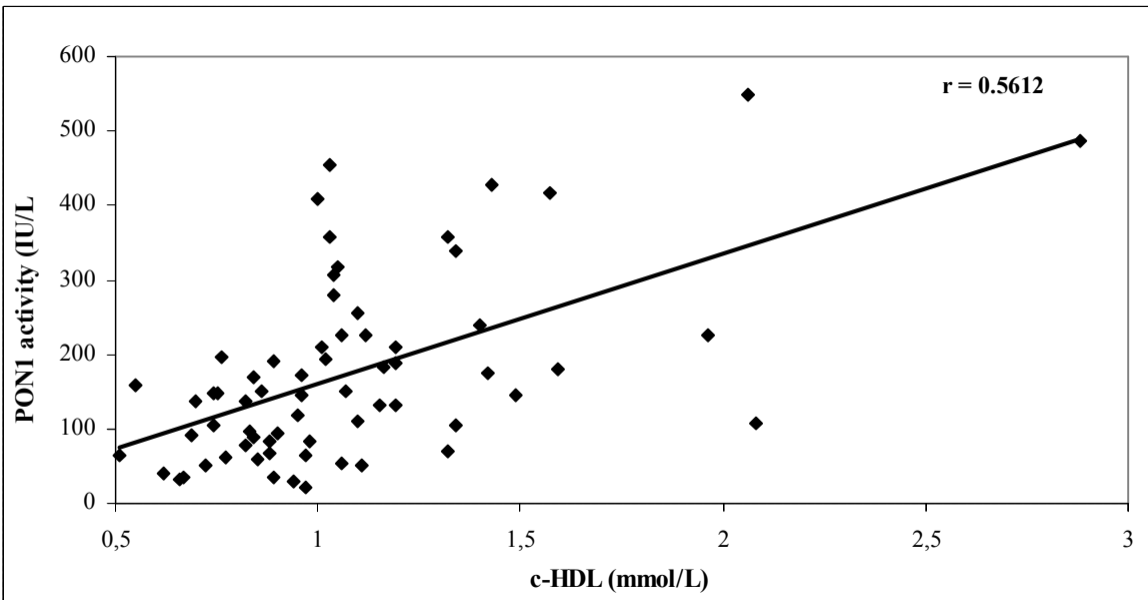

Supplement: MOESM1 [file 9615630]
